# Supplementary material for: Improving predictive asthma algorithms with modelled environment data for Scotland: an observational cohort study protocol
Source: PubMed Central journal article supplement (PMC5961591; doi:10.1136/bmjopen-2018-023289), 2018-05-20
Supplement: bmjopen-2018-023289.reviewer_comments.pdf [file bmjopen-2018-023289.reviewer_comments.pdf]

## PEER REVIEW HISTORY

BMJ Open publishes all reviews undertaken for accepted manuscripts. Reviewers are asked to complete a checklist review form (<http://bmjopen.bmj.com/site/about/resources/checklist.pdf>) and are provided with free text boxes to elaborate on their assessment. These free text comments are reproduced below.

## ARTICLE DETAILS

|                            |                                                                                                                                                                                                                        |
|----------------------------|------------------------------------------------------------------------------------------------------------------------------------------------------------------------------------------------------------------------|
| <b>TITLE (PROVISIONAL)</b> | Improving Predictive Asthma Algorithms with Modelled Environment Data for Scotland: an observational cohort study protocol                                                                                             |
| <b>AUTHORS</b>             | Soyiri, Ireneous; Sheikh, Aziz; Reis, Stefan; Kavanagh, Kimberly; Vieno, Massimo; Clemens, Tom; Carnell, Edward; Pan, Jiafeng; King, Abby; Beck, Rachel; Ward, Hester; Dibben, Chris; Robertson, Chris; Simpson, Colin |

This article was not externally reviewed at BMJ Open. Protocols that have been independently assessed prior to submission to BMJ Open are usually fast-tracked to publication on the grounds that further substantial changes will not be possible. This independent assessment will usually be external, independent review for both a substantial grant award from a non-commercial or government funder and ethics approval.
